# Supplementary material for: A Systematic Review of 207 Studies Describing Validation Aspects of the Dermatology Life Quality Index
Source: PubMed Central journal article supplement — Acta Derm Venereol. 2024 Nov 7;104:41120. doi: 10.2340/actadv.v104.41120 (PMC11559262; doi:10.2340/actadv.v104.41120), 2024-11-07

Supplementary material has been published as submitted. It has not been copyedited, or typeset by Acta Dermato-Venereologica

Fig. S1. Number of DLQI validation studies published in peer-reviewed journals (1994-2022).

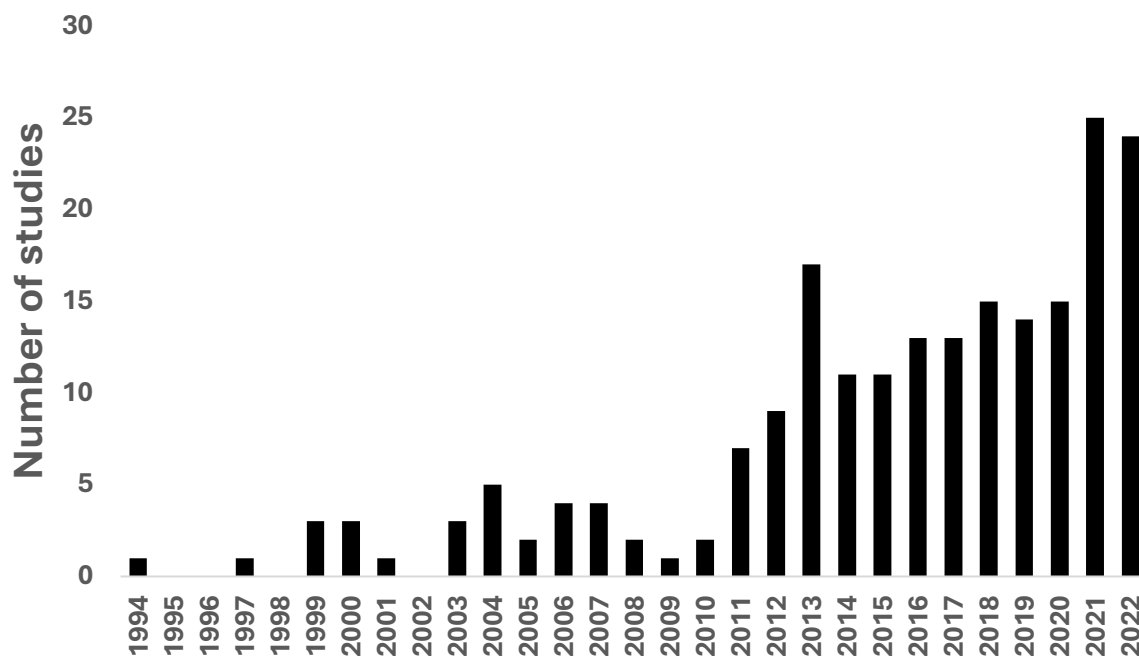

Supplement: ActaDV-104-41120-s1.pdf [file ActaDV-104-41120-s1.pdf]
